# Supplementary material for: Green synthesis of cobalt ferrite from rotten passion fruit juice and application as an electrocatalyst for the hydrogen evolution reaction
Source: Royal Society of Chemistry journal article supplement (doi:10.1039/d3ya00450c), 2024-01-01
Supplement: d3ya00450c1.pdf [file d3ya00450c1.pdf]

## Electronic Supplementary Information

### **Green synthesis of cobalt ferrite from rotten passion fruit juice and application as an electrocatalyst for the hydrogen evolution reaction**

Rochelin Prosper Medang<sup>a</sup>, Roussin Lontio Fomekong<sup>b</sup>, Edwin Akongnwi Nforna<sup>c</sup> Hypolite Mathias Kamta Tedjieukeng<sup>b</sup>, Cédrik Ngnintedem Yonti<sup>b</sup>, Patrice Kenfack Tsobnang<sup>\*d</sup>, John Ngolui Lambi<sup>b</sup> and Dieudonné Bitondo<sup>a,e</sup>

<sup>a</sup>Laboratoire de recherche Energie, Matériaux, Modélisation et Méthode (E3M), École Nationale Supérieure Polytechnique de Douala, Université de Douala, Douala, Cameroun

<sup>b</sup>Department of Chemistry, Higher Teacher Training College, University of Yaounde I

<sup>c</sup>Department of Fundamental Sciences, Higher Technical Teacher Training College, University of Bamenda

<sup>d</sup>Department of Chemistry, University of Dschang, P.O. Box 67, Dschang, Cameroon

<sup>e</sup>Département Qualité Industrielle, Hygiène, Sécurité Industrielle et Génie de l'Environnement, École Nationale Supérieure Polytechnique de Douala, Université de Douala, Douala, Cameroun

\*Corresponding authors. E-mail addresses: [Patrice.kenfack@univ-dschang.org](mailto:Patrice.kenfack@univ-dschang.org), [pakenfack@mail.com](mailto:pakenfack@mail.com) (P.Kenfack Tsobnang)

**Table S1.** Titration of the passion fruit juice

|                              | <b>1</b>     | <b>2</b>     | <b>3</b>     | <b>Average</b> |
|------------------------------|--------------|--------------|--------------|----------------|
| <b>V<sub>fruit</sub>(mL)</b> | 10,00 ± 0,01 | 10,00 ± 0,01 | 10,00 ± 0,01 | 10,00 ± 0,01   |
| <b>V<sub>NaOH</sub>(mL)</b>  | 45,00 ± 0,01 | 44,00 ± 0,01 | 46,00 ± 0,01 | 45,00 ± 0,01   |

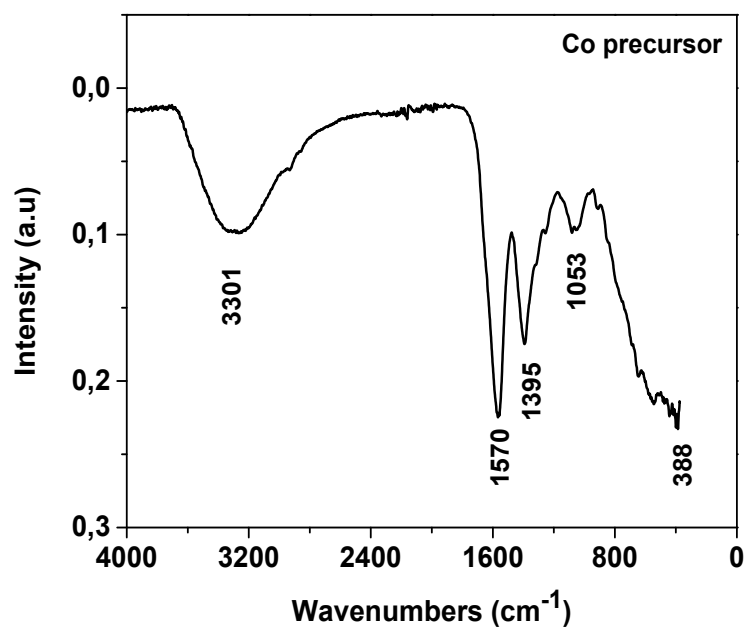

Figure S1. FTIR of Co precursor

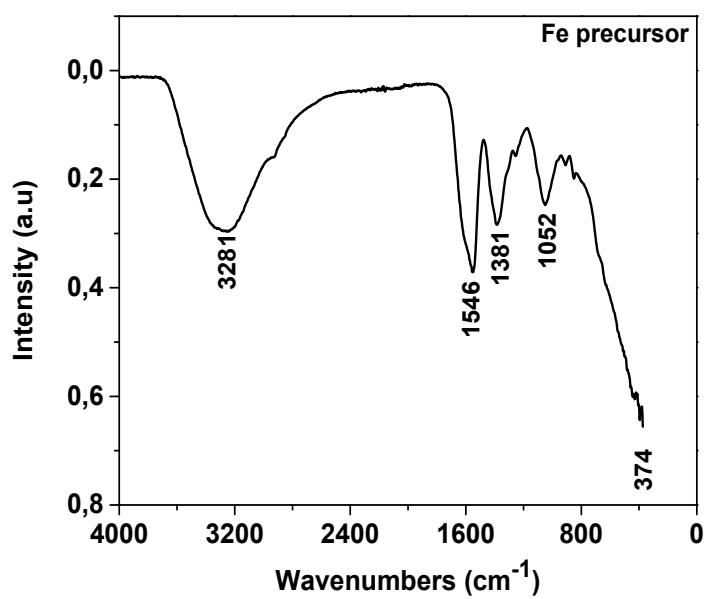

Figure S2. FTIR of Fe precursor

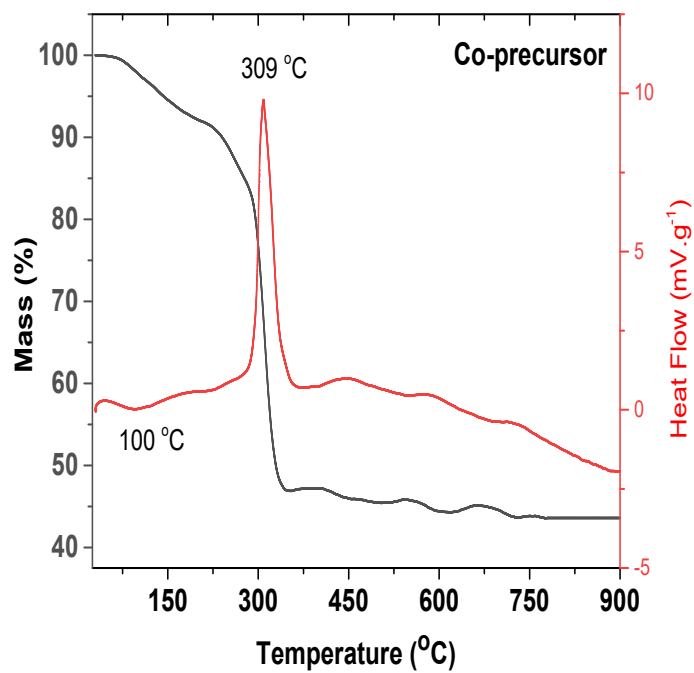

Figure S3. Thermogravimetric analysis of Co precursor

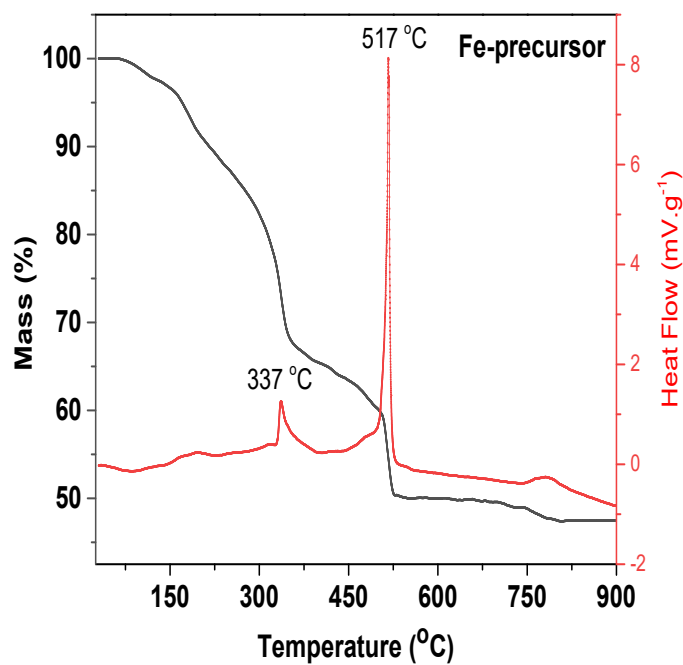

Figure S4. Thermogravimetric analysis of Fe precursor

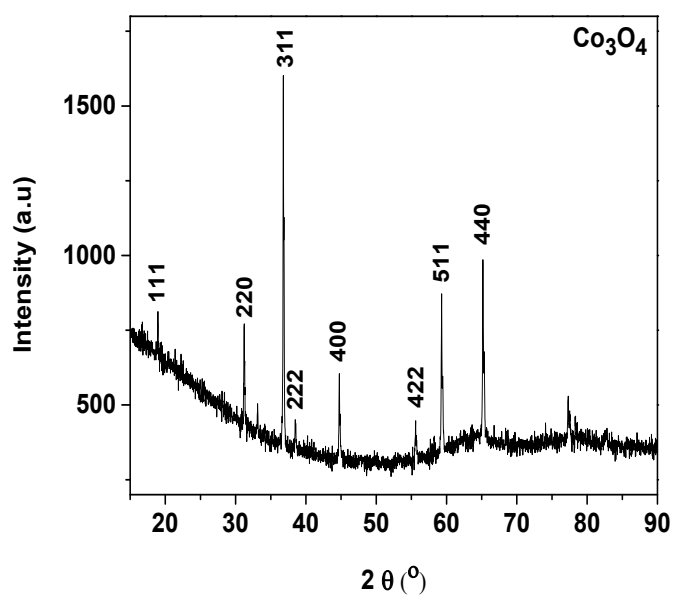

Figure S5. X-ray powder diffraction pattern of the residue from the thermal decomposition of the Co precursor

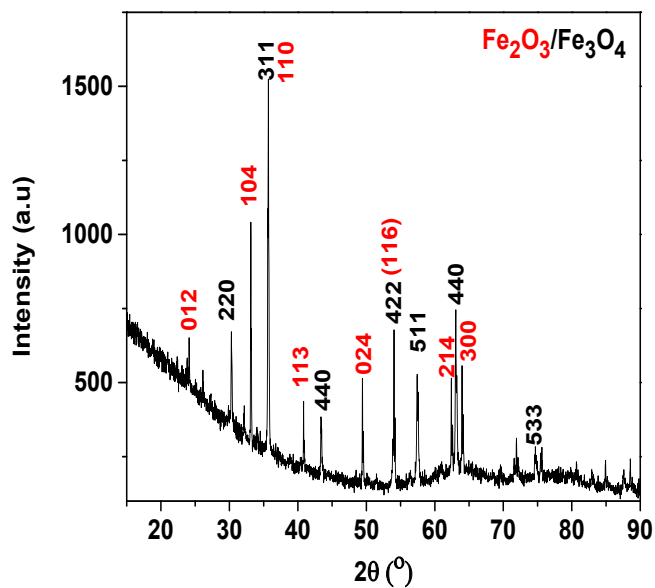

Figure S6. X-ray powder diffraction pattern of the residue from the thermal decomposition of the Fe precursor

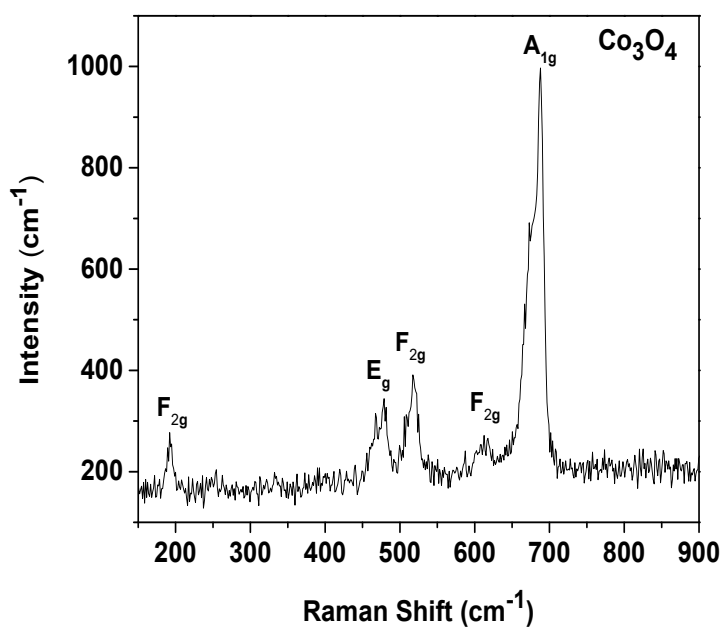

**Figure S7. Experimental Raman analysis of the residue from the thermal decomposition of the Co precursor**

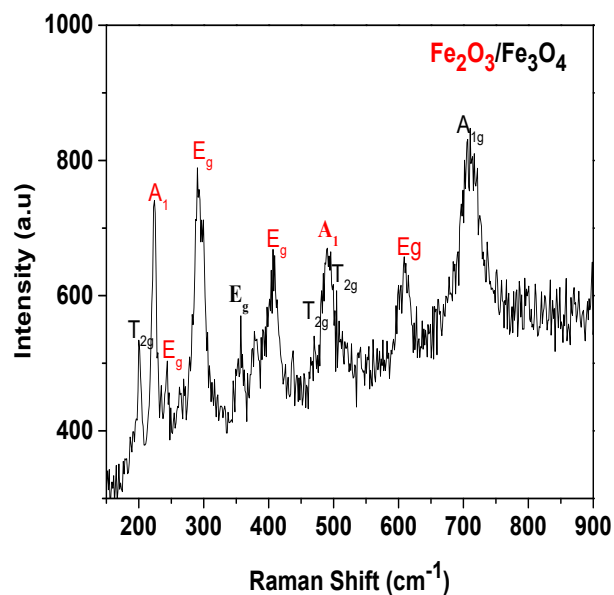

**Figure S8. Experimental Raman analysis of the residue from the thermal decomposition of the Fe precursor**

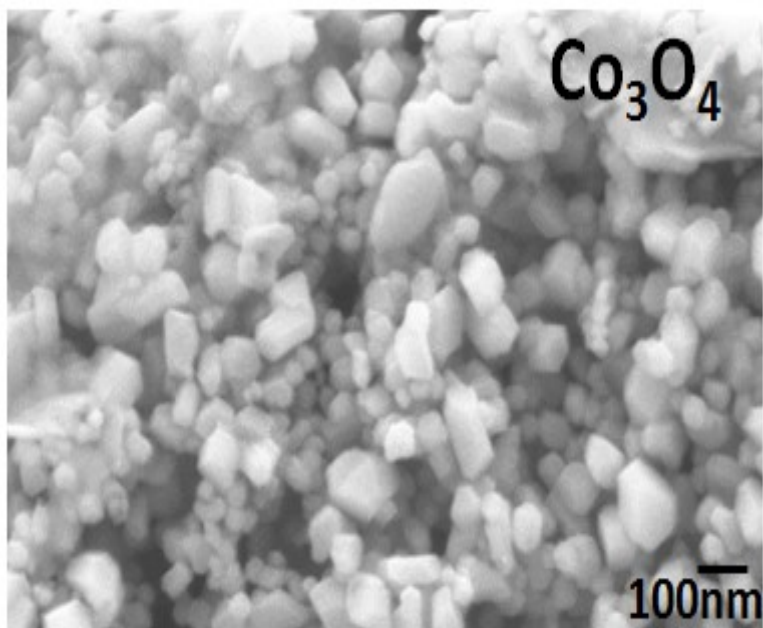

**Figure S9. SEM image of the  $\text{Co}_3\text{O}_4$  on a reduced scale  $\sim 100\text{nm}$**

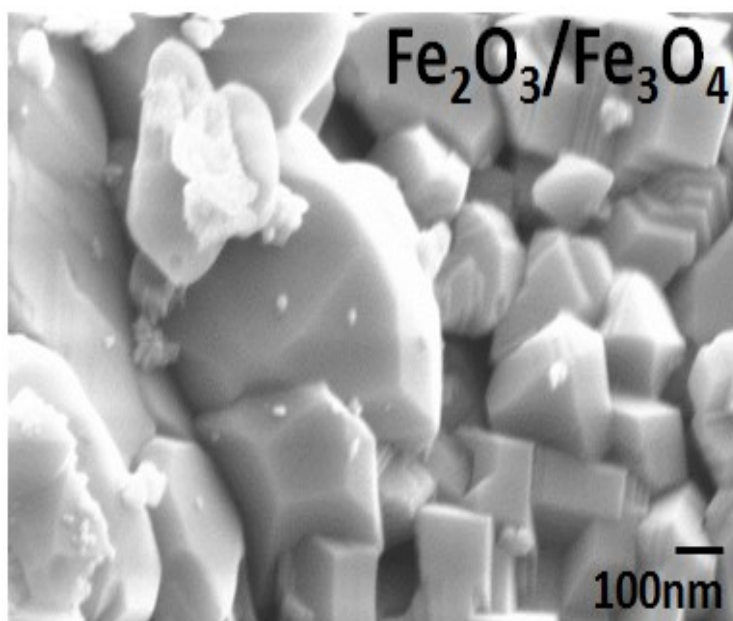

**Figure S10. SEM image of the  $\text{Fe}_2\text{O}_3/\text{Fe}_3\text{O}_4$  on a reduced scale  $\sim 100\text{nm}$**

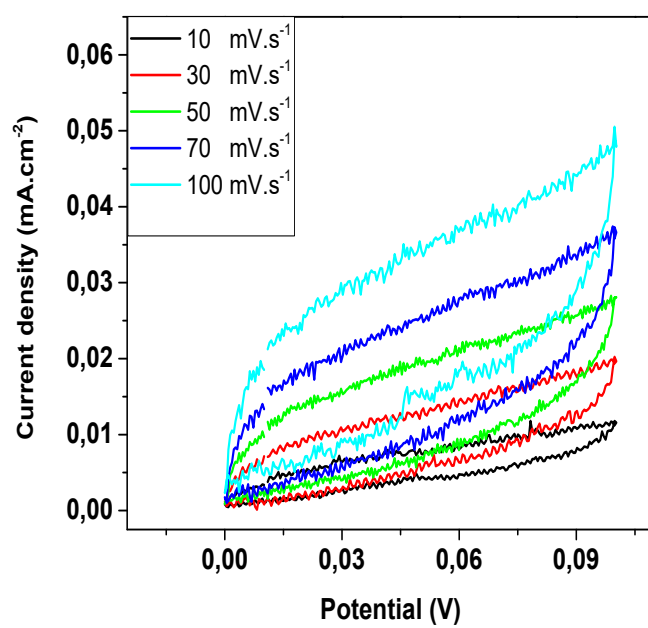

**Figure S11.** Cyclic voltametric curves of CoFe<sub>2</sub>O<sub>4</sub> at different scanning speeds
